# Supplementary material for: Estimation of creatinine clearance using plasma creatinine or cystatin C: a secondary analysis of two pharmacokinetic studies in surgical ICU patients
Source: Springer Nature journal article supplement (doi:10.1186/s12871-015-0043-7), 2015-04-27
Supplement: MOESM2 [file 9736322]

**Supplementary data to „Estimation of creatinine clearance using plasma creatinine or cystatin C: a secondary analysis of two pharmacokinetic studies in surgical ICU patients“. Separate analysis of subsets.**

| n                                                                    | Complete data set<br>100 | Only study 1<br>25 | Collection time $\geq$ 12h<br>66 | Collection time $<$ 8h<br>31 |
|----------------------------------------------------------------------|--------------------------|--------------------|----------------------------------|------------------------------|
| <b>Agreement with CL<sub>CR</sub></b>                                |                          |                    |                                  |                              |
| Bias eCL <sub>CG</sub> (mL/h/1.73m <sup>2</sup> )                    | +13.5                    | +16.4              | +12.6                            | +14.2                        |
| Bias eCL <sub>CKD-EPI</sub> (mL/h/1.73m <sup>2</sup> )               | +7.59                    | +8.39              | +4.81                            | +9.59                        |
| Bias eCL <sub>Hoek</sub> (mL/h/1.73m <sup>2</sup> )                  | -4.15                    | -3.92              | -3.45                            | -6.98                        |
| <b>Precision eCL</b>                                                 |                          |                    |                                  |                              |
| Precision eCL <sub>CG</sub> (mL/h/1.73m <sup>2</sup> )               | $\pm$ 18.5               | $\pm$ 23.1         | $\pm$ 18.6                       | $\pm$ 18.9                   |
| Precision eCL <sub>CKD-EPI</sub> (mL/h/1.73m <sup>2</sup> )          | $\pm$ 16.8               | $\pm$ 20.1         | $\pm$ 18.4                       | $\pm$ 15.6                   |
| Precision eCL <sub>Hoek</sub> (mL/h/1.73m <sup>2</sup> )             | $\pm$ 12.9               | $\pm$ 12.7         | $\pm$ 12.1                       | $\pm$ 16.2                   |
| <b>Detection of CL<sub>CR</sub> &lt;60 mL/min/1.73m<sup>2</sup></b>  |                          |                    |                                  |                              |
| Sensitivity/Specificity eCL <sub>CG</sub>                            | 0.55/0.95                | 0.88/1.0           | 0.62/0.93                        | 0.54/1.0                     |
| Sensitivity/Specificity eCL <sub>CKD-EPI</sub>                       | 0.55/0.97                | 0.88/1.0           | 0.62/0.95                        | 0.54/1.0                     |
| Sensitivity/Specificity eCL <sub>Hoek</sub>                          | 0.83/0.91                | 1.0/1.0            | 0.77/0.98                        | 1.0/0.78                     |
| AUC ROC eCL <sub>CG</sub>                                            | 0.87                     | 1.0*               | 0.90                             | 0.77                         |
| AUC ROC eCL <sub>CKD-EPI</sub>                                       | 0.86                     | 1.0*               | 0.90                             | 0.78                         |
| AUC ROC eCL <sub>Hoek</sub>                                          | 0.94                     | 1.0                | 0.95                             | 0.94                         |
| <b>Detection of CL<sub>CR</sub> &gt;130 mL/min/1.73m<sup>2</sup></b> |                          |                    |                                  |                              |
| Sensitivity/Specificity eCL <sub>CG</sub>                            | 0.69/0.81                | 0.60/0.70          | 0.67/0.76                        | 0.75/0.89                    |
| Sensitivity/Specificity eCL <sub>CKD-EPI</sub>                       | 0.25/0.96                | 0.20/0.95          | 0.25/0.96                        | 0.25/0.96                    |
| Sensitivity/Specificity eCL <sub>Hoek</sub>                          | 0.38/0.96                | 0.40/0.85          | 0.50/0.96                        | 0.0/0.96                     |
| AUC ROC eCL <sub>CG</sub>                                            | 0.86                     | 0.78               | 0.83                             | 0.91                         |
| AUC ROC eCL <sub>CKD-EPI</sub>                                       | 0.86                     | 0.86               | 0.87                             | 0.83                         |
| AUC ROC eCL <sub>Hoek</sub>                                          | 0.92                     | 0.90               | 0.95                             | 0.87                         |

CL<sub>CR</sub>: measured endogenous creatinine clearance; eCL<sub>CG</sub>, eCL<sub>CKD-EPI</sub>, eCL<sub>Hoek</sub>: estimated clearance by the Cockcroft-Gault, CKD-EPI or Hoek formula; AUC ROC: area under the curve of the receiver operating characteristic.

\*sensitivity/specificity would have been 1.0/1.0 for other cut-offs than 60 mL/h/1.73m<sup>2</sup>, explaining the perfect AUC despite imperfect sensitivity/specificity.
